# Supplementary material
Source: PubMed Central journal article supplement (PMC4784427)
Supplement: NIHMS764515-supplement-SuppMat.pdf [file NIHMS764515-supplement-SuppMat.pdf]

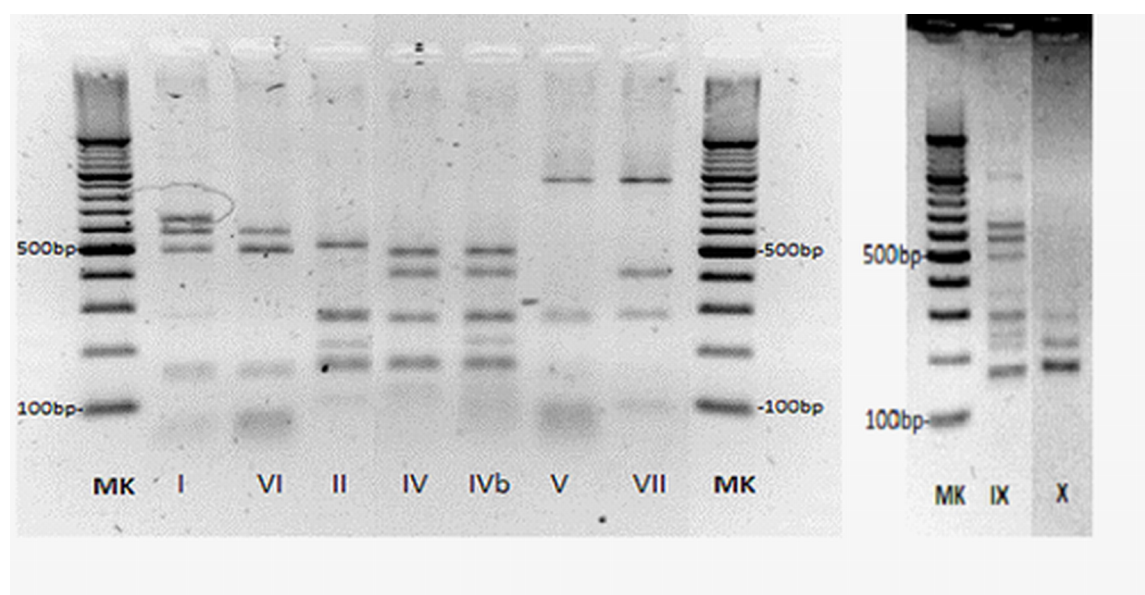

**Fig. S1.** Representation of the patterns obtained after restriction with *AfuI*. I, VI, II, IV, IVB, V, VII, IX and X are the main patterns obtained from the restriction, termed as the same. MK is a molecular weight marker (100-bp).

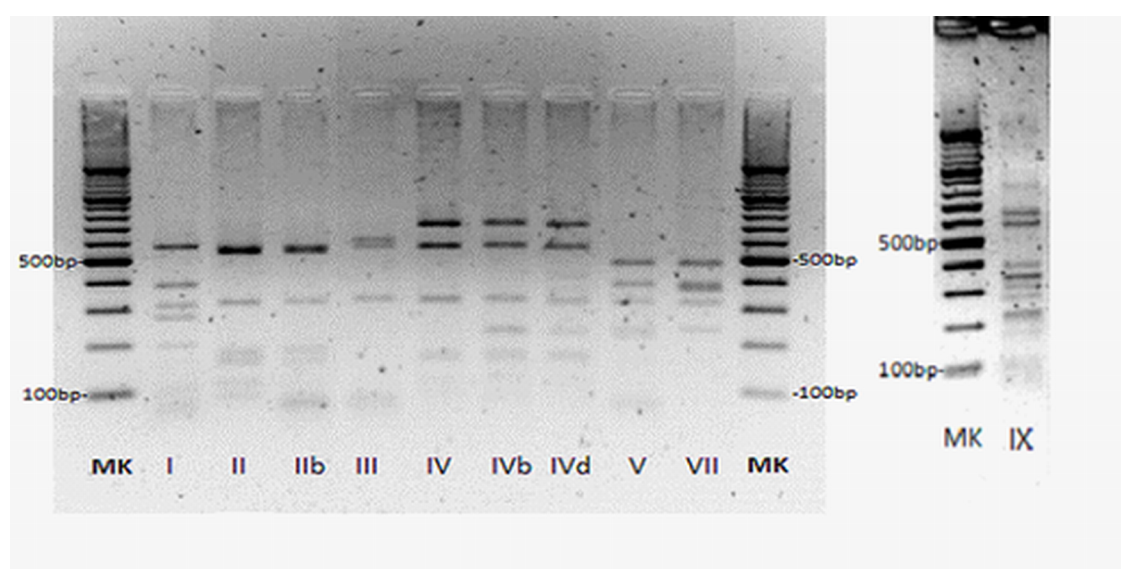

**Fig. S2.** Representation of the patterns obtained after restriction with *RsaI*. I, II, IIB, III, IV, IVB, IVD, V, VII and IX are the main patterns obtained from the restriction, termed as the same. MK is a molecular weight marker (100-bp).
